# Supplementary material for: Comprehensive analysis of the Corynebacterium glutamicum transcriptome using an improved RNAseq technique
Source: PubMed Central journal article supplement (PMC3890552; doi:10.1186/1471-2164-14-888), 2013-12-17

predicted FMN riboswitch - RF 00050  
5'-UTR of *cg0083*

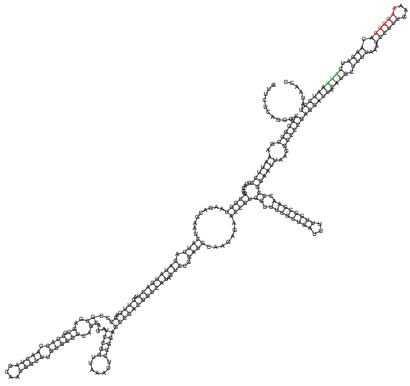

predicted *ydaO-yuaA* leader - RF 000379  
5'-UTR of *cg0936/rpf1*

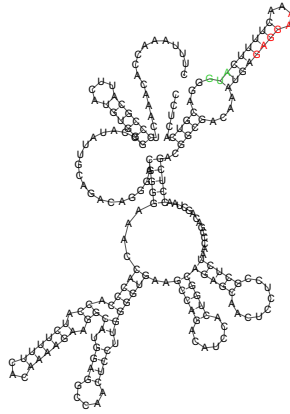

predicted TPP riboswitch - RF 00059  
5'-UTR of *cg2236/thiE*

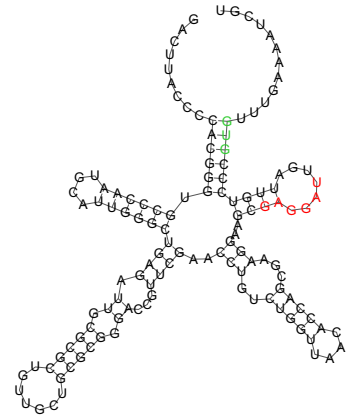

predicted *cspA* mRNA 5'-UTR;  
RNA thermometer - RF 01766  
5'-UTR of *cg0215/cspA*

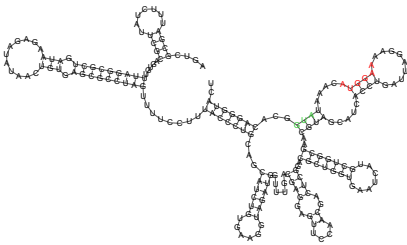

predicted TPP riboswitch - RF 00059  
5'-UTR of *cg1227*

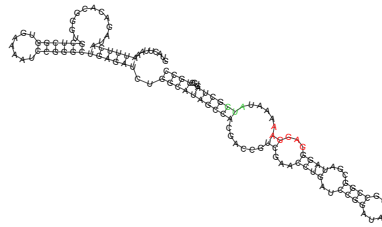

predicted *mraW* RNA motif - RF 01746  
5'-UTR of *cg2377/mraW*

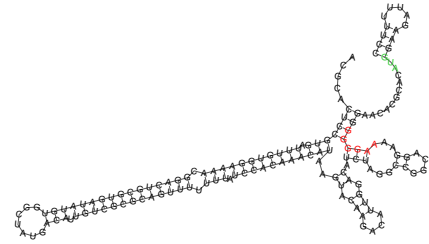

predicted TPP riboswitch - RF 00059  
5'-UTR of *cg0825*

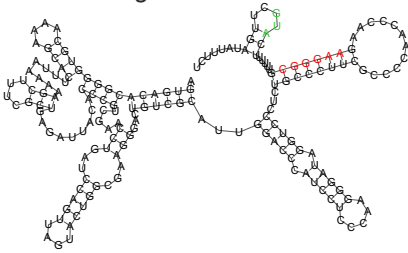

predicted TPP riboswitch - RF 00059  
5'-UTR of *cg1476/thiC*

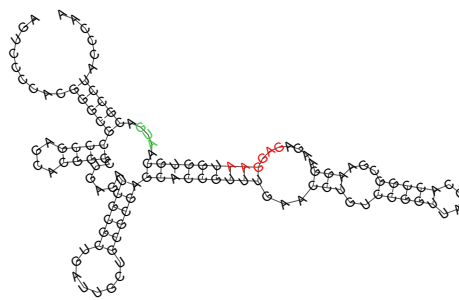

predicted *msiK* RNA motif - RF 01747  
5'-UTR of *cg2708/msiK*

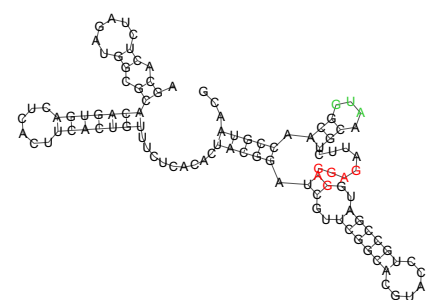

predicted SAM-IV riboswitch - RF 000634  
5'-UTR of *cg1478*

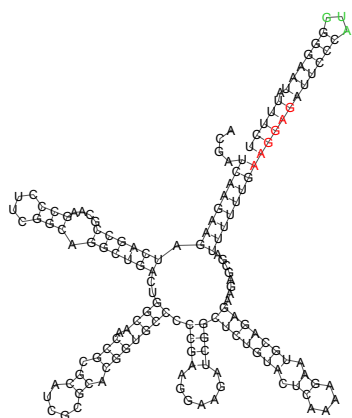

predicted TPP riboswitch - RF 00059  
5'-UTR of *cg1655/thiM*

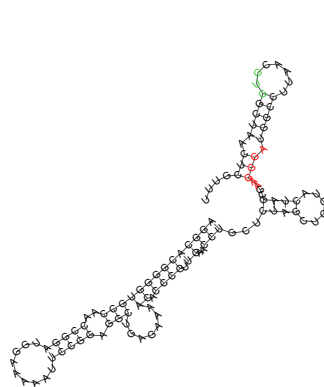

predicted *yybP-ykoY* leader - RF 00080  
5'-UTR of *cg2157/terC*

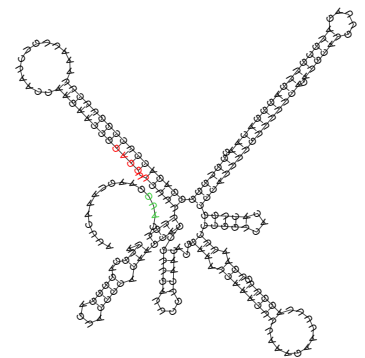

predicted *ydaO-yuaA* leader - RF 000379  
5'-UTR of *cg2402*

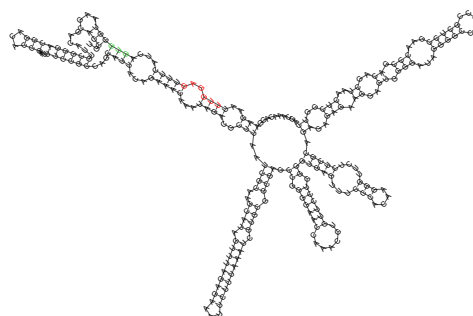

Supplement: 1471-2164-14-888-S3.pdf [file 1471-2164-14-888-S3.pdf]
