# Supplementary material for: Comprehensive analysis of the Corynebacterium glutamicum transcriptome using an improved RNAseq technique
Source: PubMed Central journal article supplement (PMC3890552; doi:10.1186/1471-2164-14-888), 2013-12-17

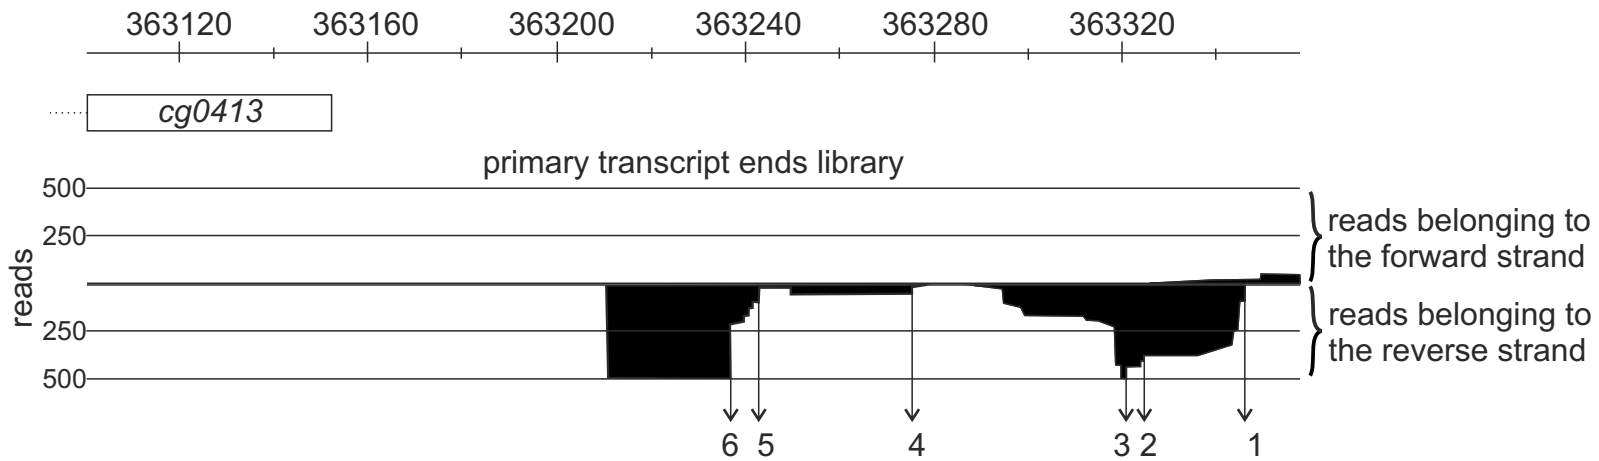

Supplement: 1471-2164-14-888-S2.pdf [file 1471-2164-14-888-S2.pdf]
